# Supplementary figures and images for: Targeting dysregulation signatures of p53-MDM2 interactions to identify newer small molecule inhibitors for cancer therapy: Insight from computational direction
Source: Research Square preprint supplement (doi:10.21203/rs.3.rs-217761/v1), 2021-02-11

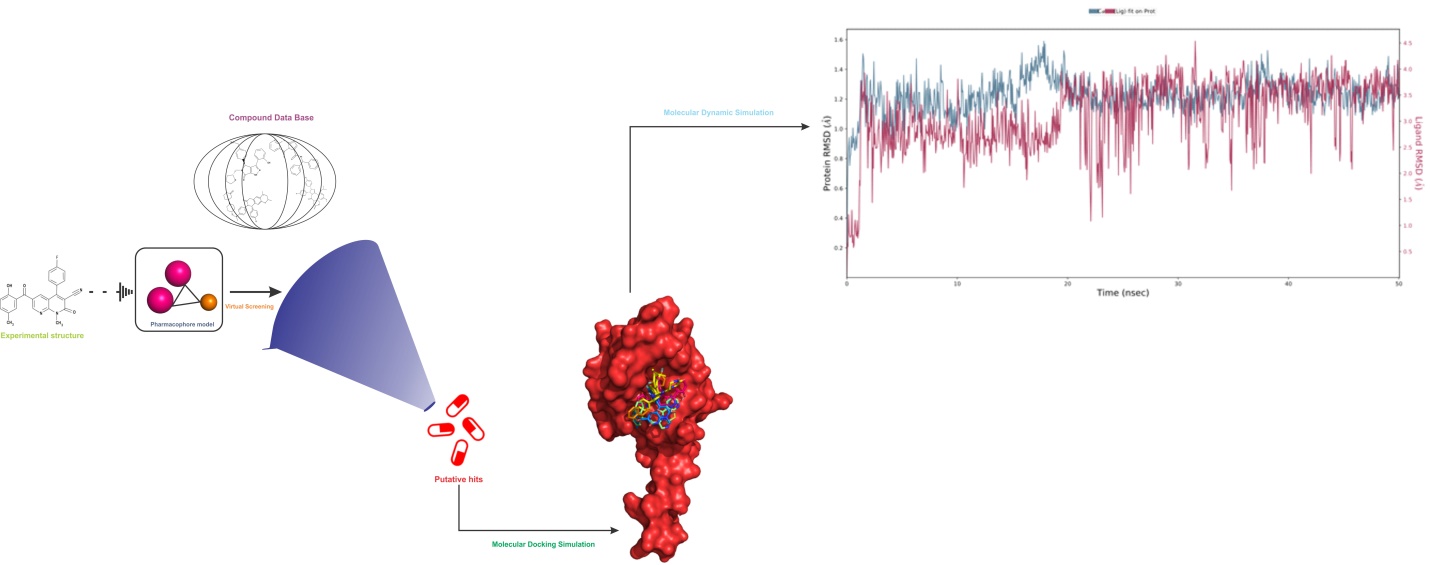


**Graphical Abstract**

Supplement: Supplementary file 1 [file faf570416cf5da90798a5798.docx]
